# Supplementary material for: Porous organic polymers as a platform for sensing applications
Source: Royal Society of Chemistry journal article supplement (doi:10.1039/d2cs00059h), 2022-01-01
Supplement: d2cs00059h1.pdf [file d2cs00059h1.pdf]

## Electronic Supplementary Information (ESI)

### Porous Organic Polymers as a Platform for Sensing Applications

Shitao Wang,<sup>1\*</sup> Hongtao Li,<sup>1</sup> Huanan Huang,<sup>2</sup> Xiaohua Cao,<sup>2</sup> Xiudong Chen,<sup>2</sup> Dapeng Cao<sup>1\*</sup>

<sup>1</sup>*State Key Laboratory of Organic-Inorganic Composites, Beijing University of Chemical Technology, Beijing*

*100029, China*

<sup>2</sup>*School of Chemistry and Environmental Engineering, Jiujiang University, Jiujiang 222005, China*

\*Corresponding Authors. Email: [stwang@buct.edu.cn](mailto:stwang@buct.edu.cn); [caodp@mail.buct.edu.cn](mailto:caodp@mail.buct.edu.cn)

**Table S1.** References for the timeline (Fig.1 in the main text) of representative development of POPs for sensing applications in the last decade since 2012.

| <b>Year</b> | <b>Events</b>                                                                    | <b>Groups</b>               | <b>Ref.</b> |
|-------------|----------------------------------------------------------------------------------|-----------------------------|-------------|
| <b>2012</b> | The first CMP sensor device (TCB-CMP) was reported for sensing arene vapors.     | Donglin Jiang               | <b>1</b>    |
|             | The first COP sensor (COP-2-4) were reported for sensing TNT and PA.             | Dapeng Cao                  | <b>2</b>    |
| <b>2013</b> | The first COF sensor (Py-Azine COF) was reported for sensing TNP.                | Donglin Jiang               | <b>3</b>    |
|             | The chiral CMP sensors were reported for sensing chiral amino alcohols.          | Yaopeng Zhao & Ruixiang Li  | <b>4</b>    |
| <b>2014</b> | The first cyanide sensor was reported.                                           | Hui Tong & Lixiang Wang     | <b>5</b>    |
|             | The CMP film through electrochemical polymerization approach was fabricated.     | Donglin Jiang               | <b>6</b>    |
| <b>2015</b> | The fluorescent pH sensor (HPP) was reported.                                    | Xuesong Jiang & Hongzhi Liu | <b>7</b>    |
| <b>2016</b> | The fluorescent 3D COF sensor (3D-Py COF) was reported for sensing PA.           | Baoshan Wang & Cheng Wang   | <b>8</b>    |
| <b>2017</b> | The fluorescent COF sensors for triacetone triperoxide (TATP) were reported.     | Dmitrii F. Perepichka       | <b>9</b>    |
|             | The absorption competition quenching mechanism for POPs was proposed.            | Xiaofei Zeng & Dapeng Cao   | <b>10</b>   |
| <b>2018</b> | The fluorescent POP sensor (PAN-L-Br) for sensing toxic pesticides was reported. | Zhonggang Wang              | <b>11</b>   |
|             | The COF based solvatochromic sensor (Py-TT COF) was reported.                    | Thomas Bein & Florian Auras | <b>12</b>   |

|             |                                                                                                                                |                                        |                         |
|-------------|--------------------------------------------------------------------------------------------------------------------------------|----------------------------------------|-------------------------|
| <b>2019</b> | The COF based chemiresistive sensors (COF-DC-8 and PBHP-TAPT-COF) for sensing gases were reported                              | Katherine A. Mirica; Michael J. Bojdys | <b>13,</b><br><b>14</b> |
|             | The fluorescent COF-based sensor for Al <sup>3+</sup> was reported                                                             | Jian-Ding Qiu                          | <b>15</b>               |
| <b>2020</b> | The fluorescent POP sensors for latent fingerprints were reported.                                                             | Dengxu Wang                            | <b>16</b>               |
| <b>2021</b> | An electrochemiluminescence biosensor based on COF nanosheets (Py-sp <sup>2</sup> c-CON) was prepared for sensing microRNA-21. | Ruo Yuan & Dong-Rong Xiao              | <b>17</b>               |
|             | A temperature gradient sensor based on ionic COF (COF-COOH/PAN) was reported for bionic thermosensation.                       | Shengqian Ma & Qi Sun                  | <b>18</b>               |

**Figure S1.** The chemical structures of POPs for the timeline (Fig.1 in the main text and Table S1) of representative development of POPs for sensing applications in the last decade since 2012.

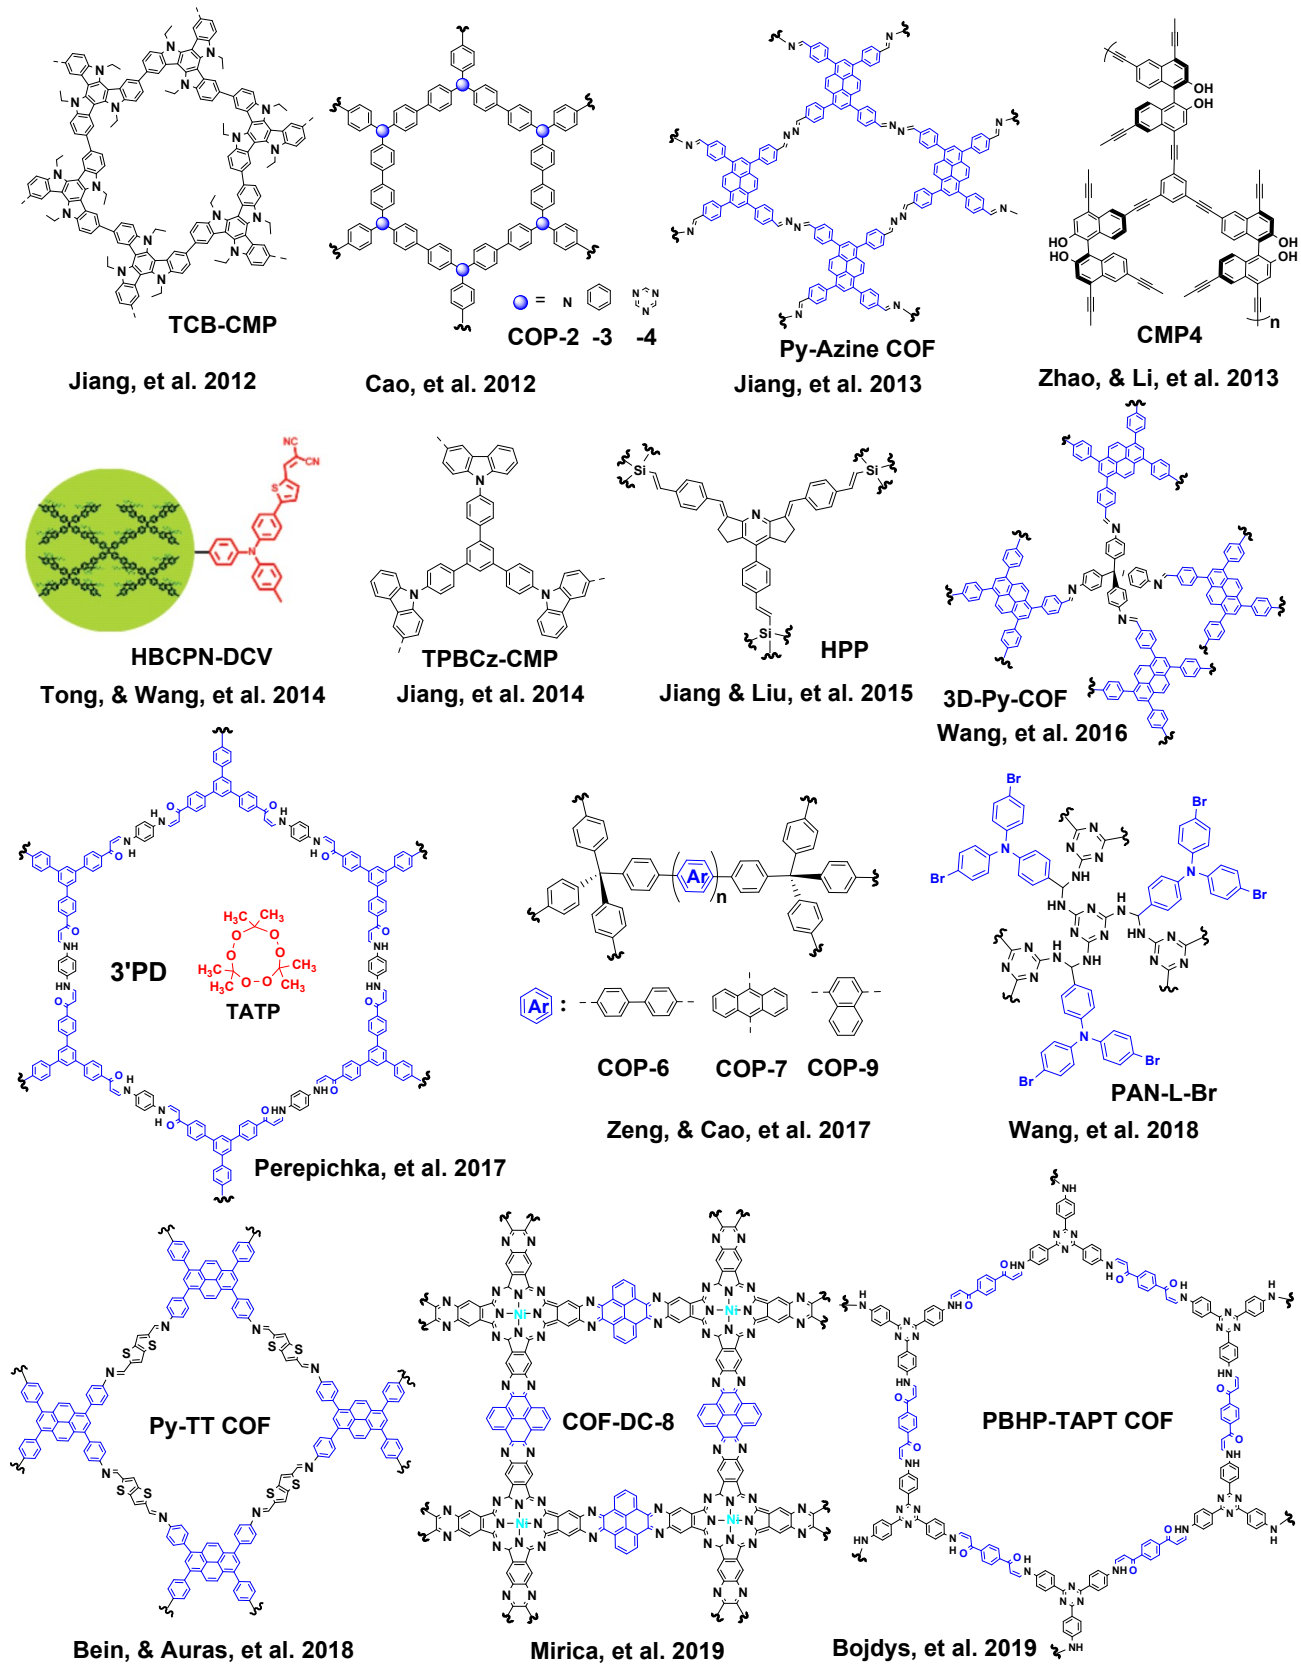

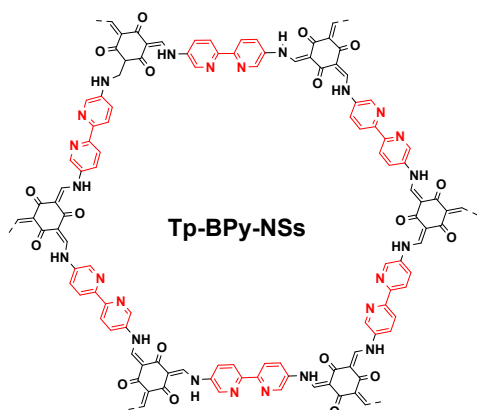

Qiu, et al. 2020

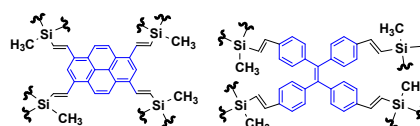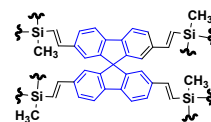

Wang, et al. 2020

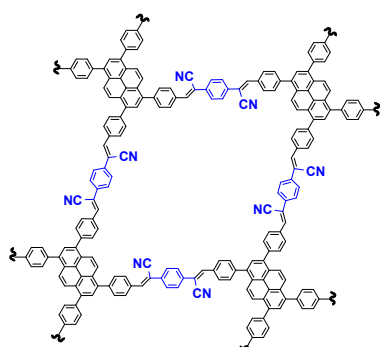

Yuan & Xiao, et al. 2021

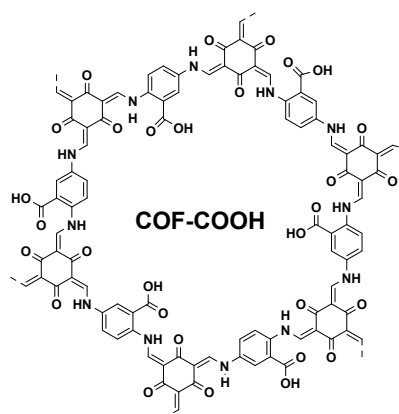

Ma & Sun, et al. 2021

## References

1. X. Liu, Y. Xu and D. Jiang, Conjugated Microporous Polymers as Molecular Sensing Devices: Microporous Architecture Enables Rapid Response and Enhances Sensitivity in Fluorescence-On and Fluorescence-Off Sensing. *J. Am. Chem. Soc.*, 2012, **134**, 8738–8741.
2. Z. Xiang and D. Cao, Synthesis of Luminescent Covalent–Organic Polymers for Detecting Nitroaromatic Explosives and Small Organic Molecules. *Macromol. Rapid Commun.*, 2012, **33**, 1184–1190.
3. S. Dalapati, S. Jin, J. Gao, Y. Xu, A. Nagai and D. Jiang, An Azine-Linked Covalent Organic Framework. *J. Am. Chem. Soc.*, 2013, **135**, 17310–17313.
4. J. Wei, X. Zhang, Y. Zhao and R. Li, Chiral Conjugated Microporous Polymers as Novel Chiral Fluorescence Sensors for Amino Alcohols. *Macromol. Chem. Phys.*, 2013, **214**, 2232–2238.
5. H. Li, X. Wu, Y. Xu, H. Tong and L. Wang, Dicyanovinyl-Functionalized Fluorescent Hyperbranched Conjugated Polymer Nanoparticles for Sensitive Naked-Eye Cyanide Ion Detection. *Polym. Chem.*, 2014, **5**, 5949–5956.
6. C. Gu, N. Huang, J. Gao, F. Xu, Y. Xu and D. Jiang, Controlled Synthesis of Conjugated Microporous Polymer Films: Versatile Platforms for Highly Sensitive and Label-Free Chemo- and Biosensing. *Angew. Chem. Int. Ed.*, 2014, **53**, 4850–4855.
7. W. Yang, X. Jiang and H. Liu, A Novel pH-Responsive POSS-Based Nanoporous Luminescent Material Derived from Brominated Distyrylpyridine and Octavinylsilsesquioxane. *RSC Adv.*, 2015, **5**, 12800–12806.
8. G. Lin, H. Ding, D. Yuan, B. Wang and C. Wang, A Pyrene-Based, Fluorescent Three-Dimensional Covalent Organic Framework. *J. Am. Chem. Soc.*, 2016, **138**, 3302–3305.
9. M. R. Rao, Y. Fang, St. De Feyter and D. F. Perepichka, Conjugated Covalent Organic Frameworks via Michael Addition–Elimination. *J. Am. Chem. Soc.*, 2017, **139**, 2421–2427.
10. L. Guo, X. Zeng, J. Lan, J. Yun and D. Cao, Absorption Competition Quenching Mechanism of Porous Covalent Organic Polymer as Luminescent Sensor for Selective Sensing Fe<sup>3+</sup>. *ChemistrySelect* 2017, **2**, 1041–1047.
11. B. Zhang, J. Yan, Y. Shang and Z. Wang, Synthesis of Fluorescent Micro- and Mesoporous Polyaminals for Detection of Toxic Pesticides. *Macromolecules* 2018, **51**, 1769–1776.
12. L. Ascherl, E. W. Evans, M. Hennemann, D. D. Nuzzo, A. G. Hufnagel, M. Beetz, R. H. Friend, T. Clark, T. Bein and F. Auras, Solvatochromic Covalent Organic Frameworks. *Nat. Commun.*, 2018, **9**, 3802.
13. Z. Meng, R. M. Stolz and K. A. Mirica, Two-Dimensional Chemiresistive Covalent Organic Framework with High Intrinsic Conductivity. *J. Am. Chem. Soc.*, 2019, **141**, 11929–11937.
14. R. Kulkarni, Y. Noda, D. K. Barange, Y. S. Kochergin, P. Lyu, B. Balcarova, P. Nachtigall and M. J. Bojdys, Real-time Optical and Electronic Sensing with a  $\beta$ -amino Enone Linked, Triazine-Containing 2D

- Covalent Organic Framework. *Nat. Commun.*, 2019, **10**, 3228.
15. W.-R. Cui, C.-R. Zhang, W. Jiang, R.-P. Liang and J.-D. Qiu, Covalent Organic Framework Nanosheets for Fluorescence Sensing via Metal Coordination. *ACS Appl. Nano Mater.*, 2019, **2**, 5342–5349.
  16. R. Sun, S. Feng, B. Zhou, Z. Chen, D. Wang and H. Liu, Flexible Cyclosiloxane-Linked Fluorescent Porous Polymers for Multifunctional Chemical Sensors. *ACS Macro Lett.*, 2020, **9**, 43–48.
  17. J. -L. Zhang, Y. Yang, W. -B. Liang, L. -Y. Yao, R. Yuan and D. -R. Xiao, Highly Stable Covalent Organic Framework Nanosheets as a New Generation of Electrochemiluminescence Emitters for Ultrasensitive MicroRNA Detection. *Anal. Chem.*, 2021, **93**, 3258–3265,
  18. W. Xian, P. Zhang, C. Zhu, X. Zuo, S. Ma and Q. Sun, Bionic Thermosensation Inspired Temperature Gradient Sensor Based on Covalent Organic Framework Nanofluidic Membrane with Ultrahigh Sensitivity. *CCS Chem.*, 2021, **3**, 2464–2472.
